# Supplementary material for: Comprehensive immunogenomic landscape analysis of prognosis-related genes in head and neck cancer
Source: PubMed Central journal article supplement (PMC7156482; doi:10.1038/s41598-020-63148-8), 2020-04-14
Supplement: 41598_2020_63148_MOESM4_ESM.pdf [file 41598_2020_63148_MOESM4_ESM.pdf]

# **Comprehensive immunogenomic landscape analysis of prognosis-related genes in head and neck cancer**

Lei Li<sup>1\*</sup>, Xiao-Li Wang<sup>2\*</sup>, Qian Lei<sup>1</sup>, Chuan-Zheng Sun<sup>1</sup>, Yan Xi<sup>1</sup>, Ran Chen<sup>1</sup>, Yong-Wen He<sup>3</sup>

<sup>1</sup>Department of Head and Neck Surgery Section II, the Third Affiliated Hospital of Kunming Medical University, 519 Kunzhou Road, Kunming, China

<sup>2</sup>Radiation Therapy Center, the Third Affiliated Hospital of Kunming Medical University, 519 Kunzhou Road, Kunming, China

<sup>3</sup>Department of Dental Research, The Affiliated Stomatological Hospital of Kunming Medical University, Yunnan, China

## **Correspondence**

Y. He, Department of Dental Research, The Affiliated Stomatological Hospital of Kunming Medical University, Block C, No. 1088 Haiyuan Middle Road, High and New Technology Zone, Kunming 650000, Yunnan, China

Fax: +86 0871 5330099

Tel: +86 1366 8796269

E-mail: k92oxu@163.com or heyongwen2@sina.com
