# Supplementary material for: Comprehensive immunogenomic landscape analysis of prognosis-related genes in head and neck cancer
Source: PubMed Central journal article supplement (PMC7156482; doi:10.1038/s41598-020-63148-8), 2020-04-14
Supplement: 41598_2020_63148_MOESM7_ESM.pdf [file 41598_2020_63148_MOESM7_ESM.pdf]

# **Comprehensive immunogenomic landscape analysis of prognosis-related genes in head and neck cancer**

Lei Li<sup>1\*</sup>, Xiao-Li Wang<sup>2\*</sup>, Qian Lei<sup>1</sup>, Chuan-Zheng Sun<sup>1</sup>, Yan Xi<sup>1</sup>, Ran Chen<sup>1</sup>, Yong-Wen He<sup>3</sup>

<sup>1</sup>Department of Head and Neck Surgery Section II, the Third Affiliated Hospital of Kunming Medical University, 519 Kunzhou Road, Kunming, China

<sup>2</sup>Radiation Therapy Center, the Third Affiliated Hospital of Kunming Medical University, 519 Kunzhou Road, Kunming, China

<sup>3</sup>Department of Dental Research, The Affiliated Stomatological Hospital of Kunming Medical University, Yunnan, China

## **Correspondence**

Y. He, Department of Dental Research, The Affiliated Stomatological Hospital of Kunming Medical University, Block C, No. 1088 Haiyuan Middle Road, High and New Technology Zone, Kunming 650000, Yunnan, China

Fax: +86 0871 5330099

Tel: +86 1366 8796269

E-mail: k92oxu@163.com or heyongwen2@sina.com

**Figure S1.** (A) Forest plot of hazard ratios show the prognosis-related immune genes in HPV+ HNSCC patients. Red dots represent high risk genes ( $HR > 1$ ), green dots represent low risk genes ( $HR < 1$ ). (B) Association between risk score and the distribution of high (red) and low (green) risk groups. (C) Survival status of the HPV+ HNSCC patients in different groups; red and green dots represent deceased and surviving patients, respectively. (D) Heat map representing the expression level of the prognostic genes based on the high-risk group and the low-risk group. (E) The overall survival rates of different groups of HPV+ HNSCC patients. (F) Verification of the accuracy of the prognostic model via analysis of the area under curve (AUC) of the receiver operating characteristic (ROC) curve.

**Table S1. The list of immune-related genes**

**Table S2. Identification of the survival-related IRGs** (The  $\log_2 FC$  means  $\log_2 |\text{fold change}|$ ,  $\log F/C > 1$  indicated that the expression of gene was up-regulated in HPV+ HNSCC patients, while  $\log F/C < 1$  indicated that expression of gene was down-regulated in HPV+ HNSCC patients). The FDR means the false discovery rate.

Tumor mean represented the average gene expression in tumor samples and normal mean represented the average gene expression in normal samples.

**Table S3.** Relationships between the expression of immune-related genes and overall survival in HPV+ HNSCC patients. Immune-related genes were divided into high risk and low risk the prognosis-related genes via HR value ( $HR > 1$  indicated high risk and  $HR < 1$  indicated low risk).
