# Supplementary material for: Comprehensive immunogenomic landscape analysis of prognosis-related genes in head and neck cancer
Source: PubMed Central journal article supplement (PMC7156482; doi:10.1038/s41598-020-63148-8), 2020-04-14
Supplement: 41598_2020_63148_MOESM9_ESM.pdf [file 41598_2020_63148_MOESM9_ESM.pdf]

# **Comprehensive immunogenomic landscape analysis of prognosis-related genes in head and neck cancer**

Lei Li<sup>1\*</sup>, Xiao-Li Wang<sup>2\*</sup>, Qian Lei<sup>1</sup>, Chuan-Zheng Sun<sup>1</sup>, Yan Xi<sup>1</sup>, Ran Chen<sup>1</sup>, Yong-Wen He<sup>3</sup>

<sup>1</sup>Department of Head and Neck Surgery Section II, the Third Affiliated Hospital of Kunming Medical University, 519 Kunzhou Road, Kunming, China

<sup>2</sup>Radiation Therapy Center, the Third Affiliated Hospital of Kunming Medical University, 519 Kunzhou Road, Kunming, China

<sup>3</sup>Department of Dental Research, The Affiliated Stomatological Hospital of Kunming Medical University, Yunnan, China

## **Correspondence**

Y. He, Department of Dental Research, The Affiliated Stomatological Hospital of Kunming Medical University, Block C, No. 1088 Haiyuan Middle Road, High and New Technology Zone, Kunming 650000, Yunnan, China

Fax: +86 0871 5330099

Tel: +86 1366 8796269

E-mail: k92oxu@163.com or heyongwen2@sina.com

| Gene     | Normal Mean | Tumor Mean  | logFC     | P value  | FDR      |
|----------|-------------|-------------|-----------|----------|----------|
| IL12A    | 0.555976095 | 0.223027363 | -1.317802 | 0.000136 | 0.00026  |
| TEC      | 1.46982345  | 0.60201631  | -1.287768 | 6.31E-13 | 4.69E-12 |
| SFTPA2   | 0.766671931 | 0.336438314 | -1.188267 | 1.59E-10 | 7.76E-10 |
| CXCL2    | 9.723854423 | 4.565688464 | -1.090696 | 0.017695 | 0.024321 |
| INHA     | 0.076166441 | 0.214585107 | 1.4943226 | 1.13E-06 | 2.98E-06 |
| CSPG5    | 0.109208815 | 0.314350353 | 1.5252841 | 0.000161 | 0.000305 |
| IL22RA2  | 0.1338516   | 0.453174929 | 1.7594337 | 6.36E-07 | 1.74E-06 |
| IL1B     | 3.710741148 | 13.10607739 | 1.8204567 | 1.08E-06 | 2.85E-06 |
| SSTR2    | 0.105505064 | 0.406339649 | 1.9453739 | 4.01E-08 | 1.32E-07 |
| IGLV3-21 | 45.49312311 | 177.2342444 | 1.961937  | 0.005405 | 0.0081   |
| BIRC5    | 5.051176243 | 20.54924905 | 2.0243944 | 2.61E-24 | 1.53E-21 |
| CD70     | 0.308391571 | 2.87821674  | 3.22234   | 1.26E-15 | 1.65E-14 |
| PDIA2    | 0.059697766 | 1.199043433 | 4.3280632 | 2.80E-05 | 5.92E-05 |
