# Supplementary material for: Comprehensive immunogenomic landscape analysis of prognosis-related genes in head and neck cancer
Source: PubMed Central journal article supplement (PMC7156482; doi:10.1038/s41598-020-63148-8), 2020-04-14
Supplement: 41598_2020_63148_MOESM10_ESM.pdf [file 41598_2020_63148_MOESM10_ESM.pdf]

# **Comprehensive immunogenomic landscape analysis of prognosis-related genes in head and neck cancer**

Lei Li<sup>1\*</sup>, Xiao-Li Wang<sup>2\*</sup>, Qian Lei<sup>1</sup>, Chuan-Zheng Sun<sup>1</sup>, Yan Xi<sup>1</sup>, Ran Chen<sup>1</sup>, Yong-Wen He<sup>3</sup>

<sup>1</sup>Department of Head and Neck Surgery Section II, the Third Affiliated Hospital of Kunming Medical University, 519 Kunzhou Road, Kunming, China

<sup>2</sup>Radiation Therapy Center, the Third Affiliated Hospital of Kunming Medical University, 519 Kunzhou Road, Kunming, China

<sup>3</sup>Department of Dental Research, The Affiliated Stomatological Hospital of Kunming Medical University, Yunnan, China

## **Correspondence**

Y. He, Department of Dental Research, The Affiliated Stomatological Hospital of Kunming Medical University, Block C, No. 1088 Haiyuan Middle Road, High and New Technology Zone, Kunming 650000, Yunnan, China

Fax: +86 0871 5330099

Tel: +86 1366 8796269

E-mail: k92oxu@163.com or heyongwen2@sina.com

| Gene     | HR        | HR95%CI   | HR95%CI   | P value   |
|----------|-----------|-----------|-----------|-----------|
| PDIA2    | 1.9333939 | 1.1345263 | 3.2947778 | 0.0153492 |
| CXCL2    | 1.0683744 | 1.0094507 | 1.1307375 | 0.0223167 |
| IL1B     | 1.0842039 | 1.0034858 | 1.1714147 | 0.0405484 |
| SFTPA2   | 4.8136268 | 1.4775263 | 15.682294 | 0.0091135 |
| BIRC5    | 1.0875321 | 1.0190678 | 1.1605961 | 0.0114287 |
| IGLV3-21 | 1.0013302 | 1.0000071 | 1.002655  | 0.0487794 |
| CD70     | 1.0344991 | 1.004435  | 1.0654632 | 0.0241933 |
| CSPG5    | 2.0452826 | 1.0498753 | 3.9844547 | 0.0354646 |
| IL12A    | 1.8495177 | 1.0927576 | 3.1303519 | 0.0220009 |
| INHA     | 43.673222 | 1.0711101 | 1780.723  | 0.0459041 |
| IL22RA2  | 1.3660737 | 1.0217743 | 1.8263892 | 0.0352613 |
| SSTR2    | 1.1725153 | 1.0121521 | 1.3582862 | 0.0339274 |
| TEC      | 19.620388 | 1.1897086 | 323.57473 | 0.0373942 |
